# Supplementary material for: Synthesis and characterization of heterometallic complexes as nanofibers by a solvothermal route
Source: Royal Society of Chemistry journal article supplement (doi:10.1039/c3ra41219a), 2013-01-01
Supplement: c3ra41219a.pdf [file c3ra41219a.pdf]

## Supporting Information

### Synthesis and Characterization of Heterometallic Complexes as Nanofibers by a Solvothermal Route

Yanyan Xu, Yaqiu Sun, \* Shuang Yang, Guoying Zhang and Dongzhao Gao

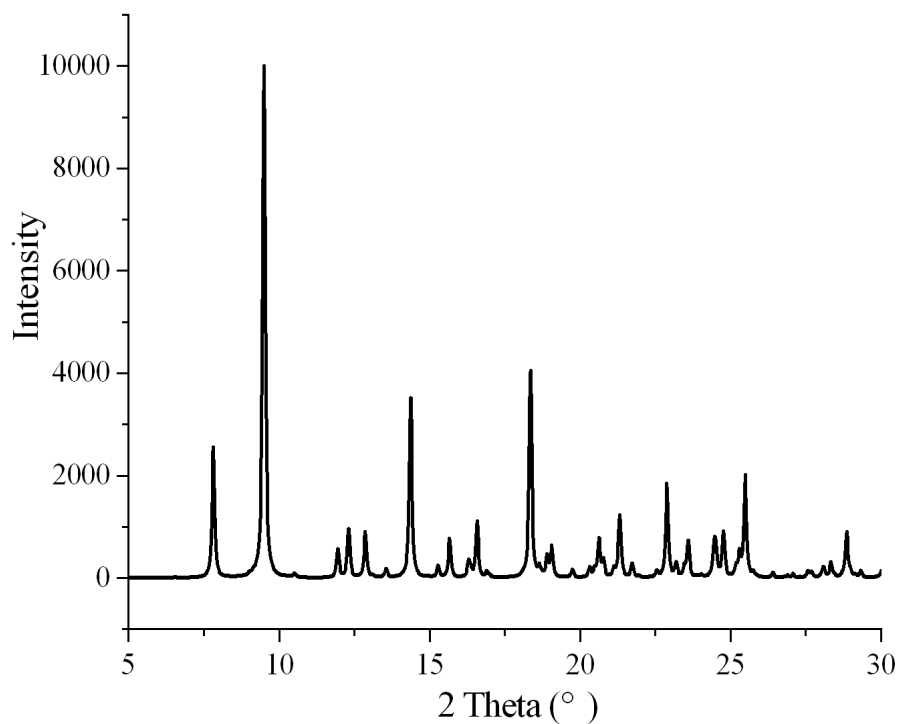

Fig. S1 The simulated PXRD pattern of the  $[\text{Mn}(\text{CuL})_3(\text{ClO}_4)_2]_n$  crystal reported in ref. 43.
